# Supplementary material for: Influence of nickel doping on the moisture adsorption properties of magnesium aluminate spinel: thermodynamic and kinetic analysis
Source: Royal Society of Chemistry journal article supplement (doi:10.1039/d5ra09380e), 2026-01-01
Supplement: d5ra09380e1.pdf [file d5ra09380e1.pdf]

## Supplementary data

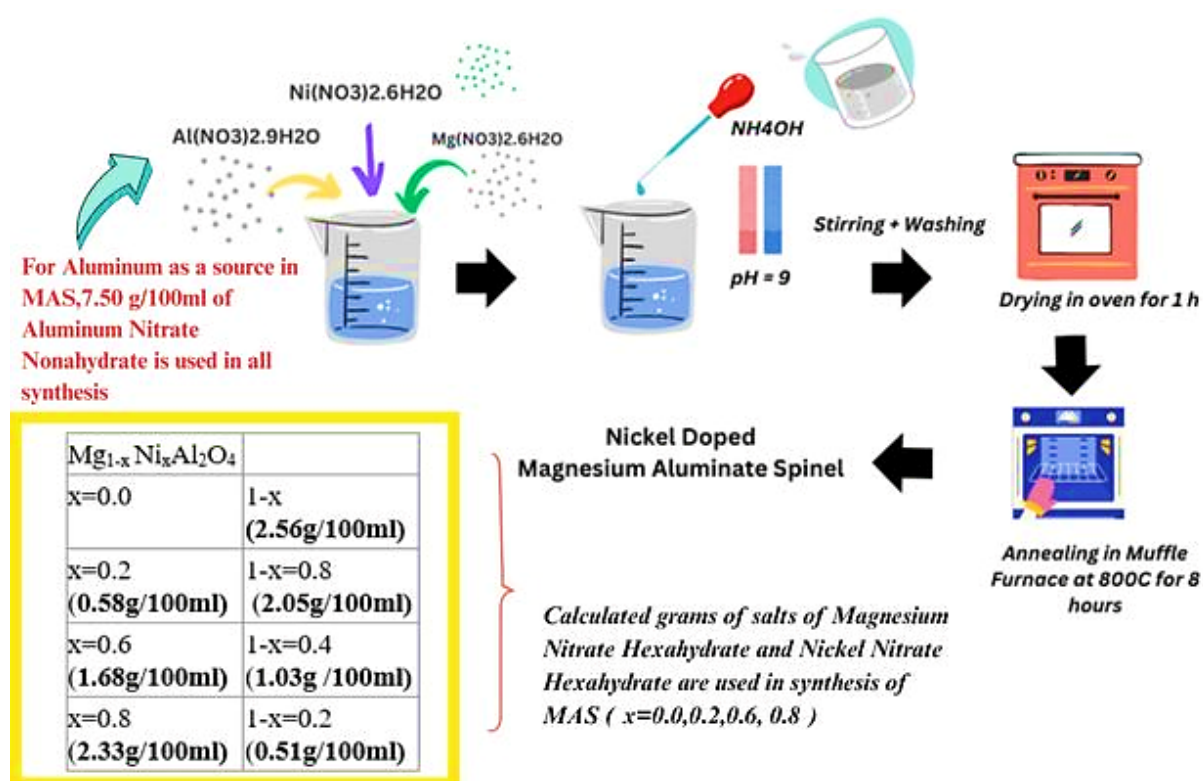

Figure S1: Scheme for synthesis of  $\text{Mg}_{1-x}\text{Ni}_x\text{Al}_2\text{O}_4$  ( $x=0.0, 0.2, 0.6, 0.8$ )
